# Supplementary material
Source: MDPI journal article supplement (https://www.mdpi.com/search?q=water-11-02262)
Supplement: s001 [file water-11-02262-s001.pdf]

# Article Title: Numerical and laboratory investigations of closely-spaced and joint infiltration of precipitation and treated waste water

In Journal: Water

## Authors:

Falk Händel <sup>1,2,†</sup>, Thomas Fichtner <sup>1,\*</sup>, and Peter-Wolfgang Graeber <sup>1</sup>

<sup>1</sup> Technische Universität Dresden, Institute of Groundwater Management; [falk.haendel@tu-dresden.de](mailto:falk.haendel@tu-dresden.de) (F.H.); [thomas.fichtner@tu-dresden.de](mailto:thomas.fichtner@tu-dresden.de) (T. F.); [peter-wolfgang.graeber@tu-dresden.de](mailto:peter-wolfgang.graeber@tu-dresden.de) (P.W.G)

<sup>2</sup> Helmholtz-Centre for Environmental Research, Department Monitoring and Exploration Technologies; [falk.haendel@ufz.de](mailto:falk.haendel@ufz.de)

\* Correspondence: [thomas.fichtner@tu-dresden.de](mailto:thomas.fichtner@tu-dresden.de), Tel.: +49 351 463 42560

† Both authors contributed equally to this study and should be considered as first authors

**Electronic Supplementary Materials S1:** Results for simulation of water contents for scenarios WW-Rep (sep.), WW-RE-Ref (sep.), WW-RE-Rep-2 (sep.), WW-RE-24 (sep.) and WW-RE-Int (sep.) as compared to observed values in the laboratory tank experiment for the separated ditches

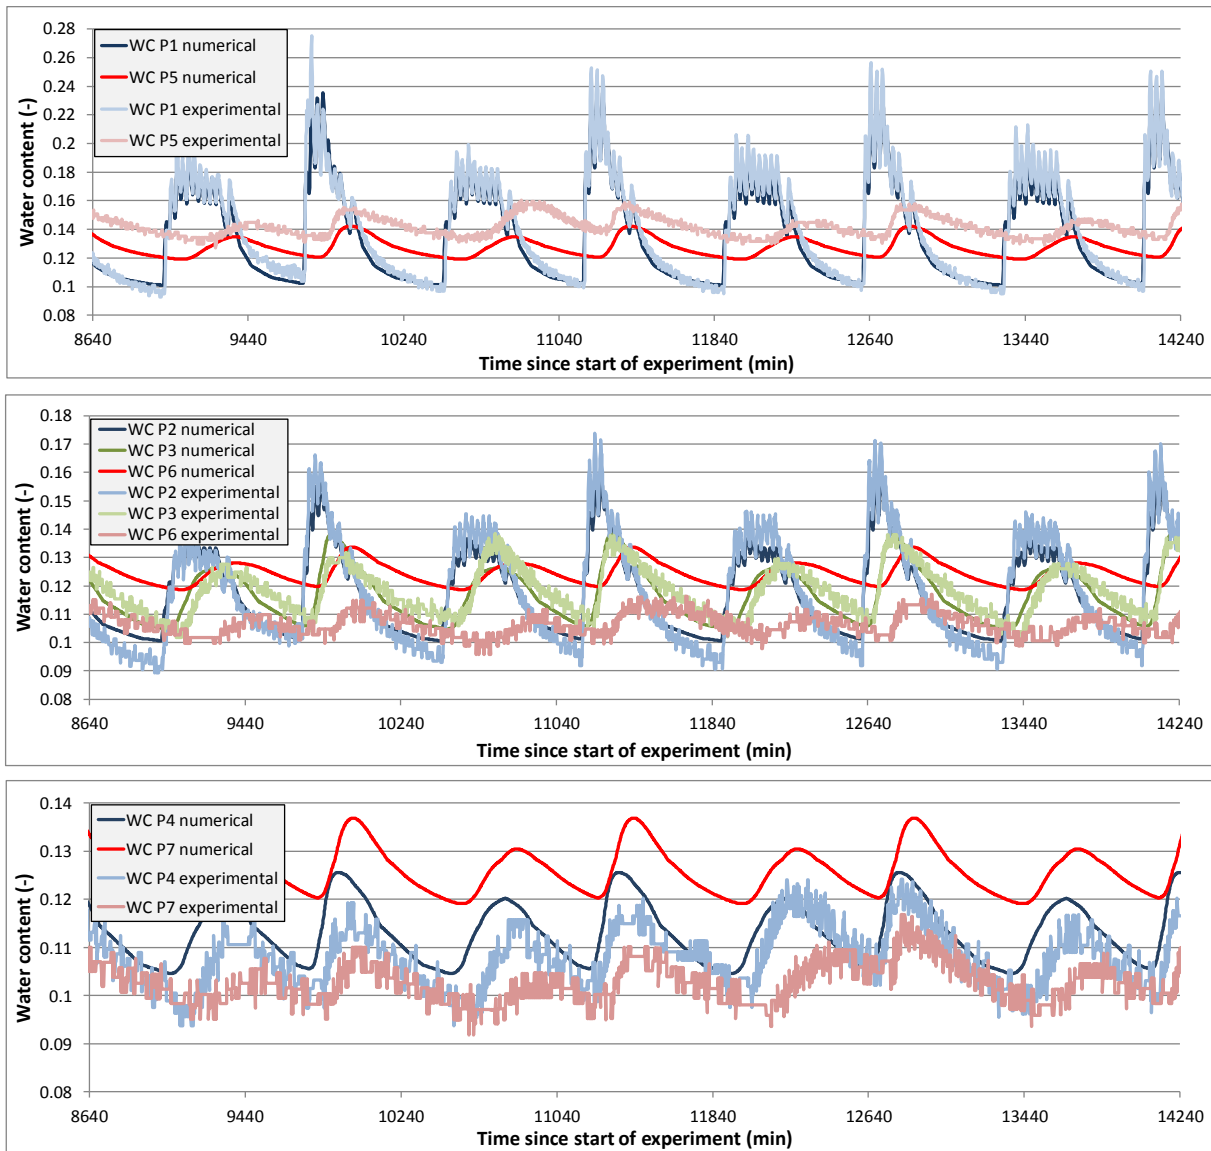

**Figure S1(1).** Results for simulation of water contents for scenario WW-Rep (sep.) as compared to observed values in the laboratory tank experiment for the time of 8640 to 14240 min after onset of numerical experiment

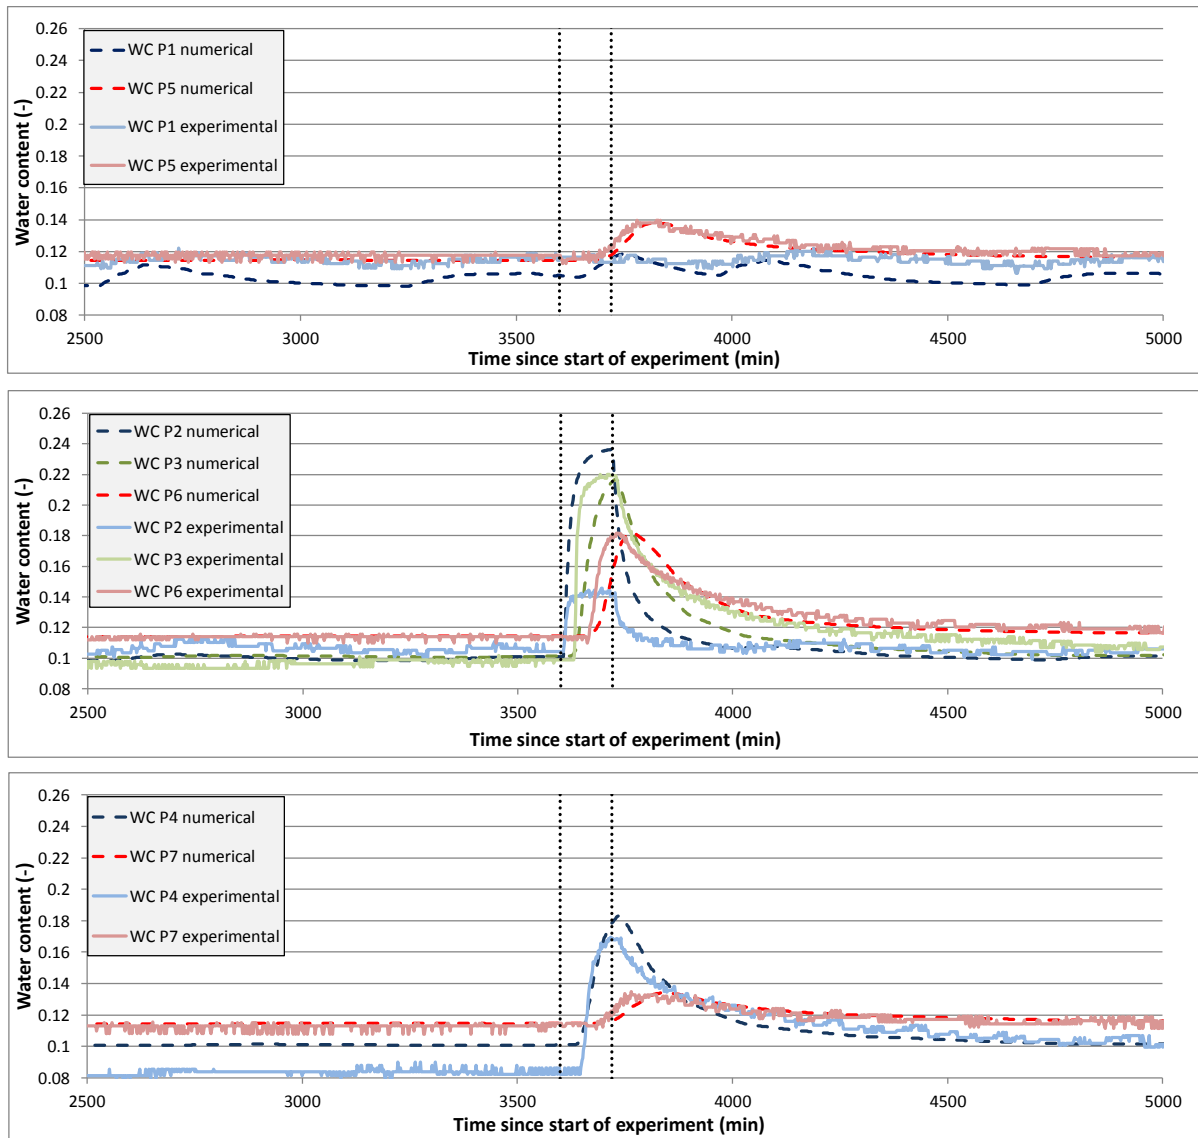

**Figure S1(2).** Results for simulation of water contents for scenario WW-RE-Ref (sep.) as compared to observed values in the laboratory tank experiment for the time 2500 to 5000 min after onset of the numerical experiment, black dotted line indicates duration of precipitation event

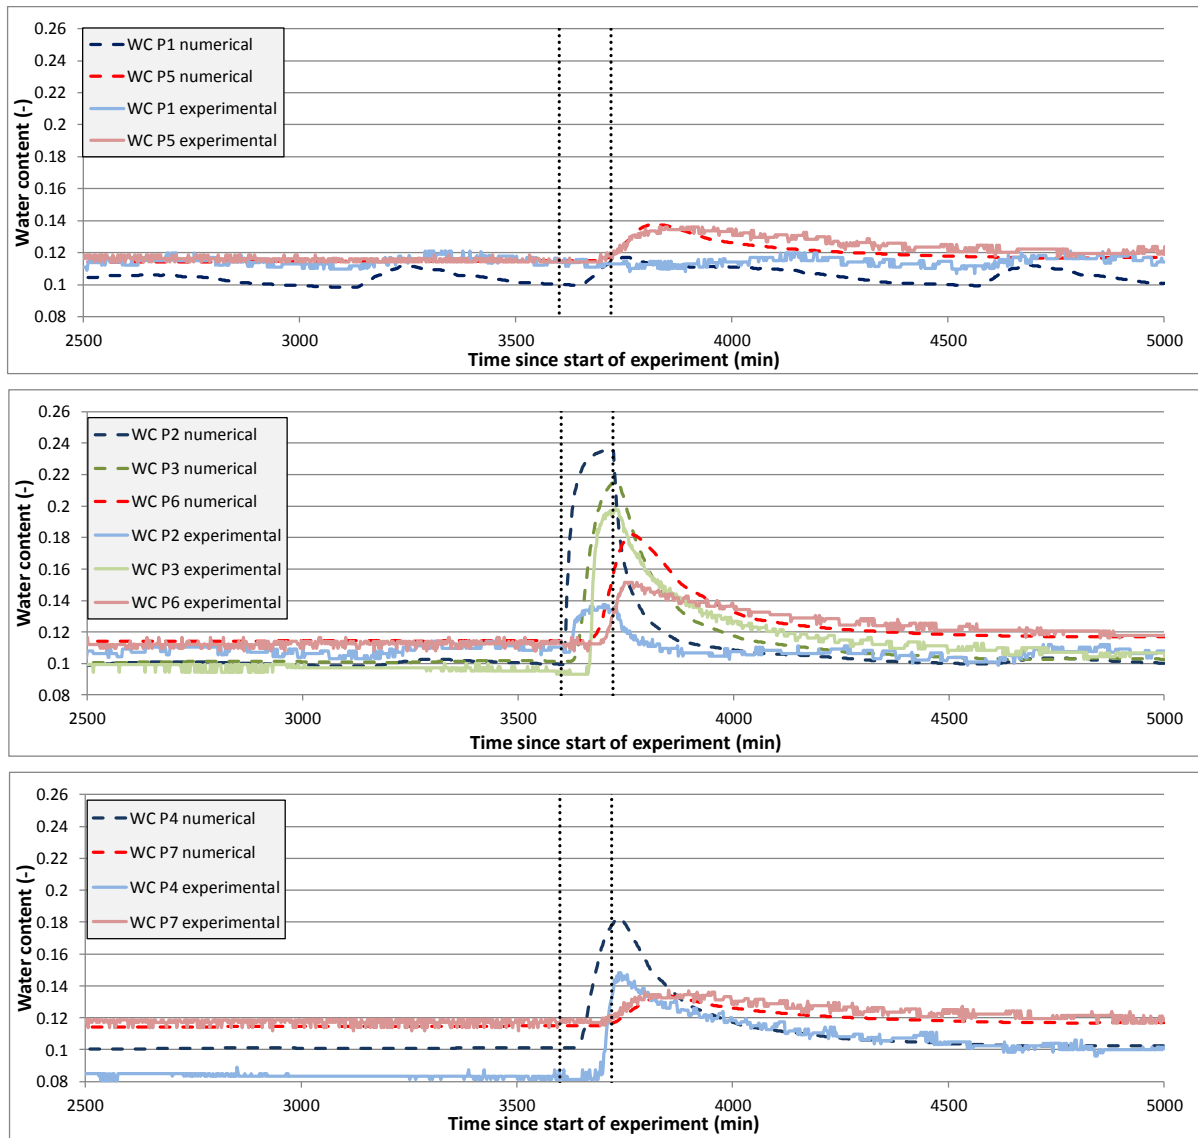

**Figure S1(3).** Results for simulation of water contents for scenario WW-RE-Rep-2 (sep.) as compared to observed values in the laboratory tank experiment for the time 2500 to 5000 min after onset of the numerical experiment, black dotted line indicates duration of precipitation event

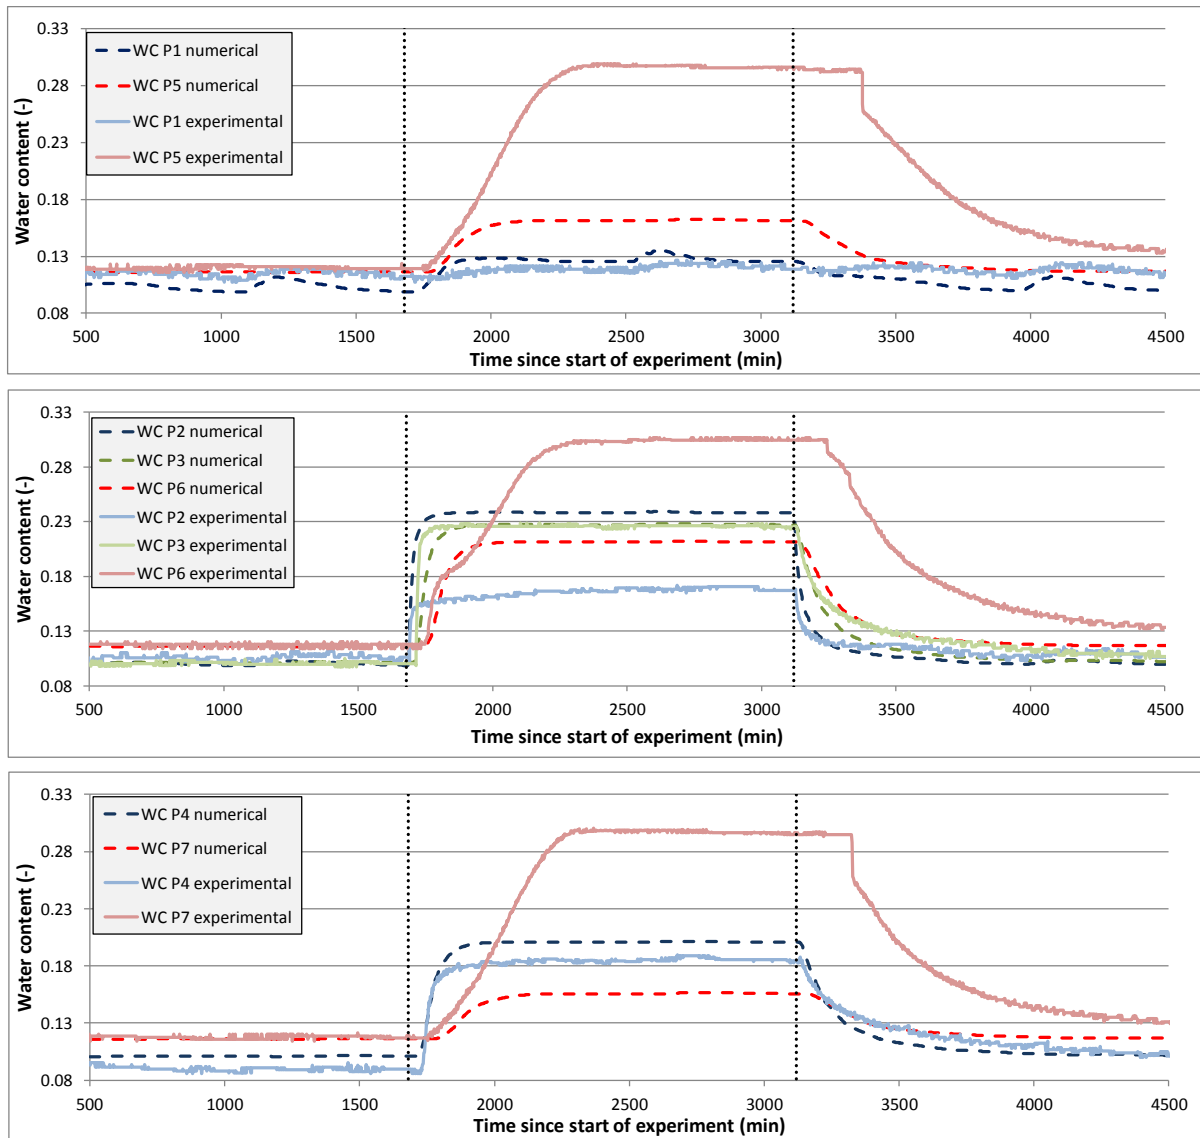

**Figure S1(4).** Results for simulation of water contents for scenario WW-RE-24 (sep.) as compared to observed values in the laboratory tank experiment for the time 500 to 4500 min after onset of the numerical experiment, black dotted line indicates duration of precipitation event

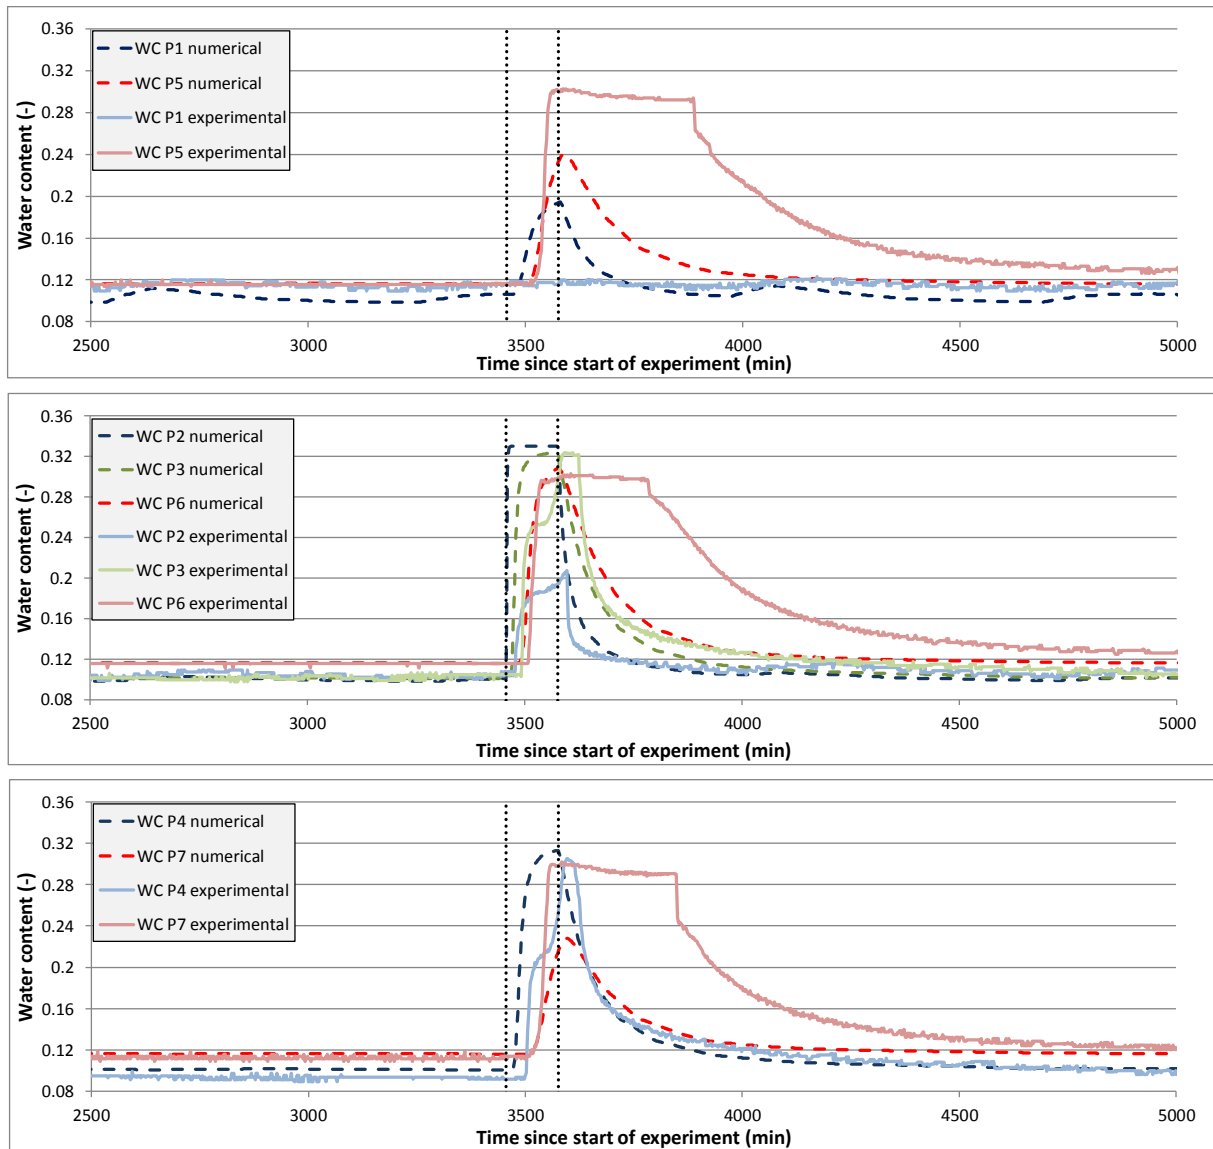

**Figure S1(5).** Results for simulation of water contents for scenario WW-RE-Int (sep.) as compared to observed values in the laboratory tank experiment for the time 2500 to 5000 min after onset of the numerical experiment, black dotted line indicates duration of precipitation event

**Electronic Supplementary Materials S2:** Results for simulation of water contents for scenarios WW-RE-Rep-1 (jnt.), WW-RE-Rep-2 (jnt.), WW-RE-24 (jnt.) as compared to observed values in the laboratory tank experiment for the joint ditch

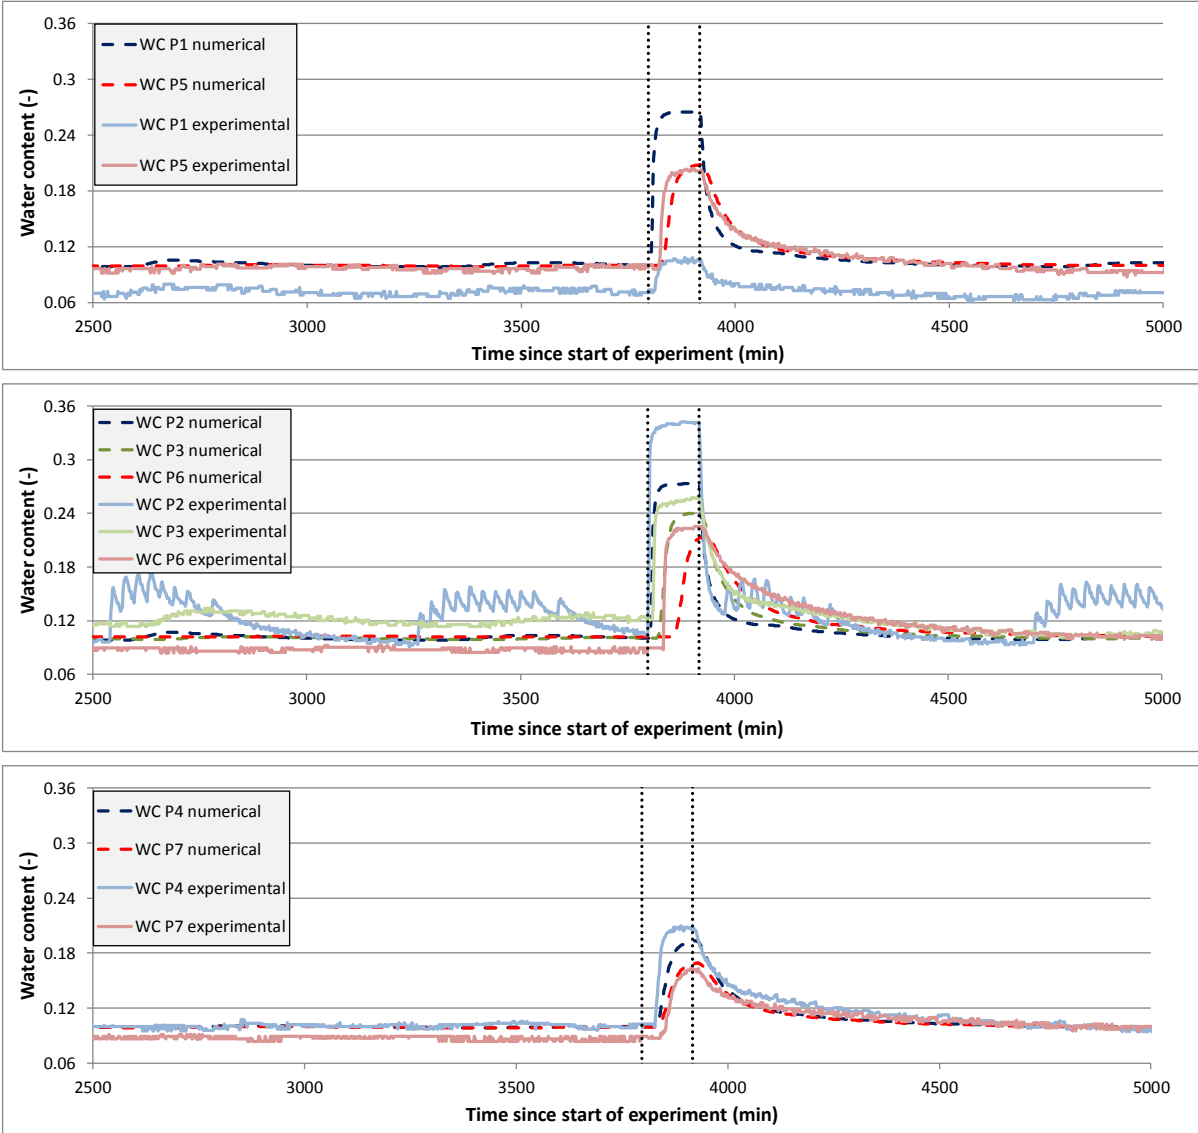

**Figure S2(1).** Results for simulation of water contents for scenario WW-RE-Rep-1 (jnt.) as compared to observed values in the laboratory tank experiment for the time 2500 to 5000 min after onset of the numerical experiment, black dotted line indicates duration of precipitation event

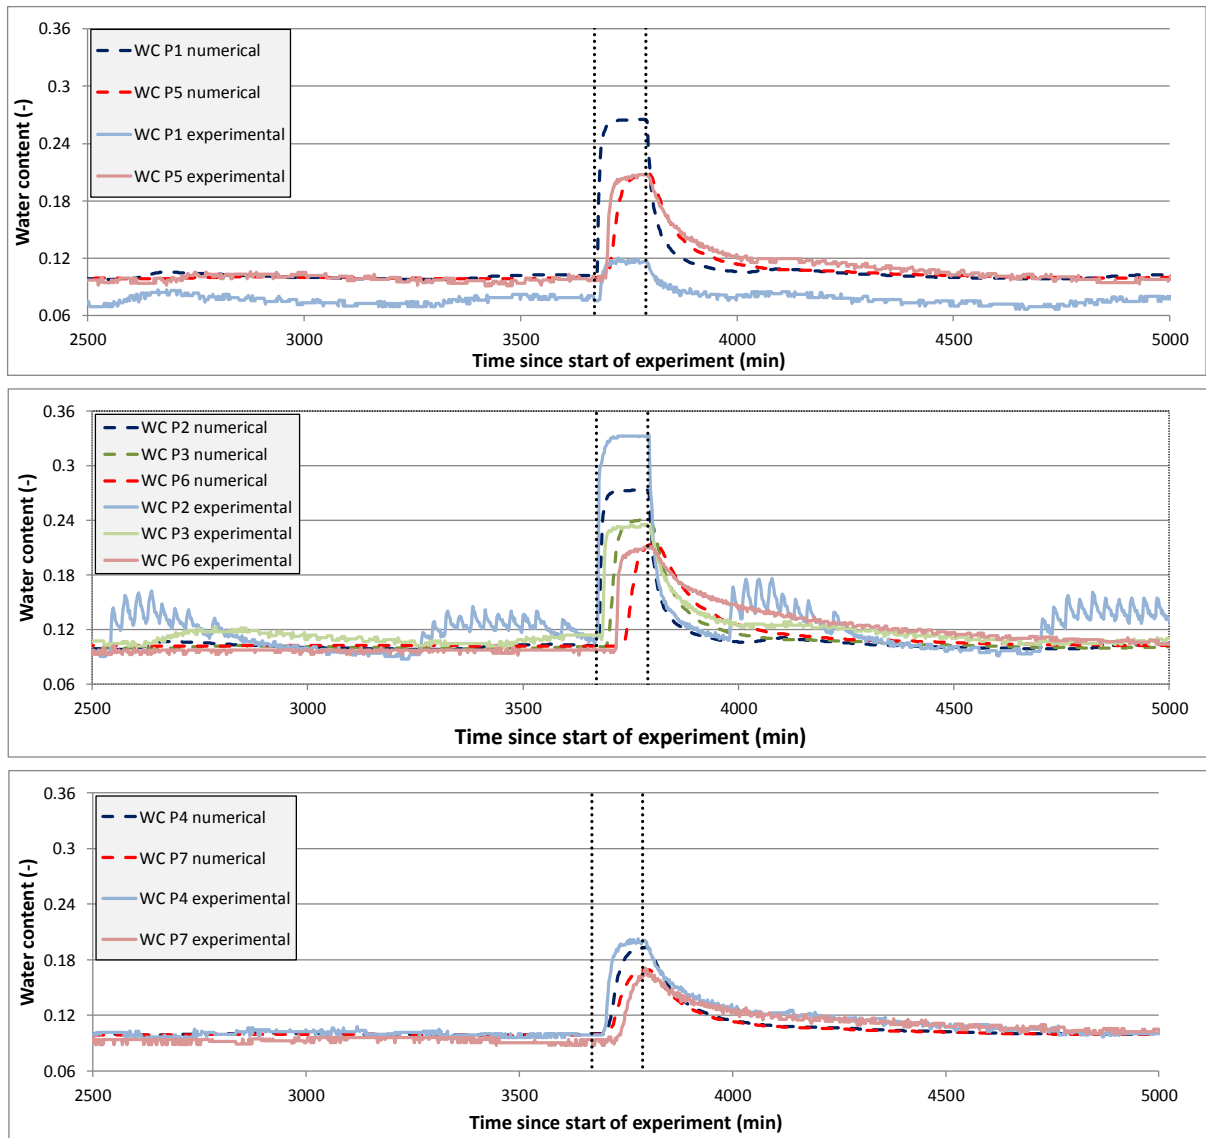

**Figure S2(2).** Results for simulation of water contents for scenario WW-RE-Rep-2 (jnt.) as compared to observed values in the laboratory tank experiment for the time 2500 to 5000 min after onset of the numerical experiment, black dotted line indicates duration of precipitation event



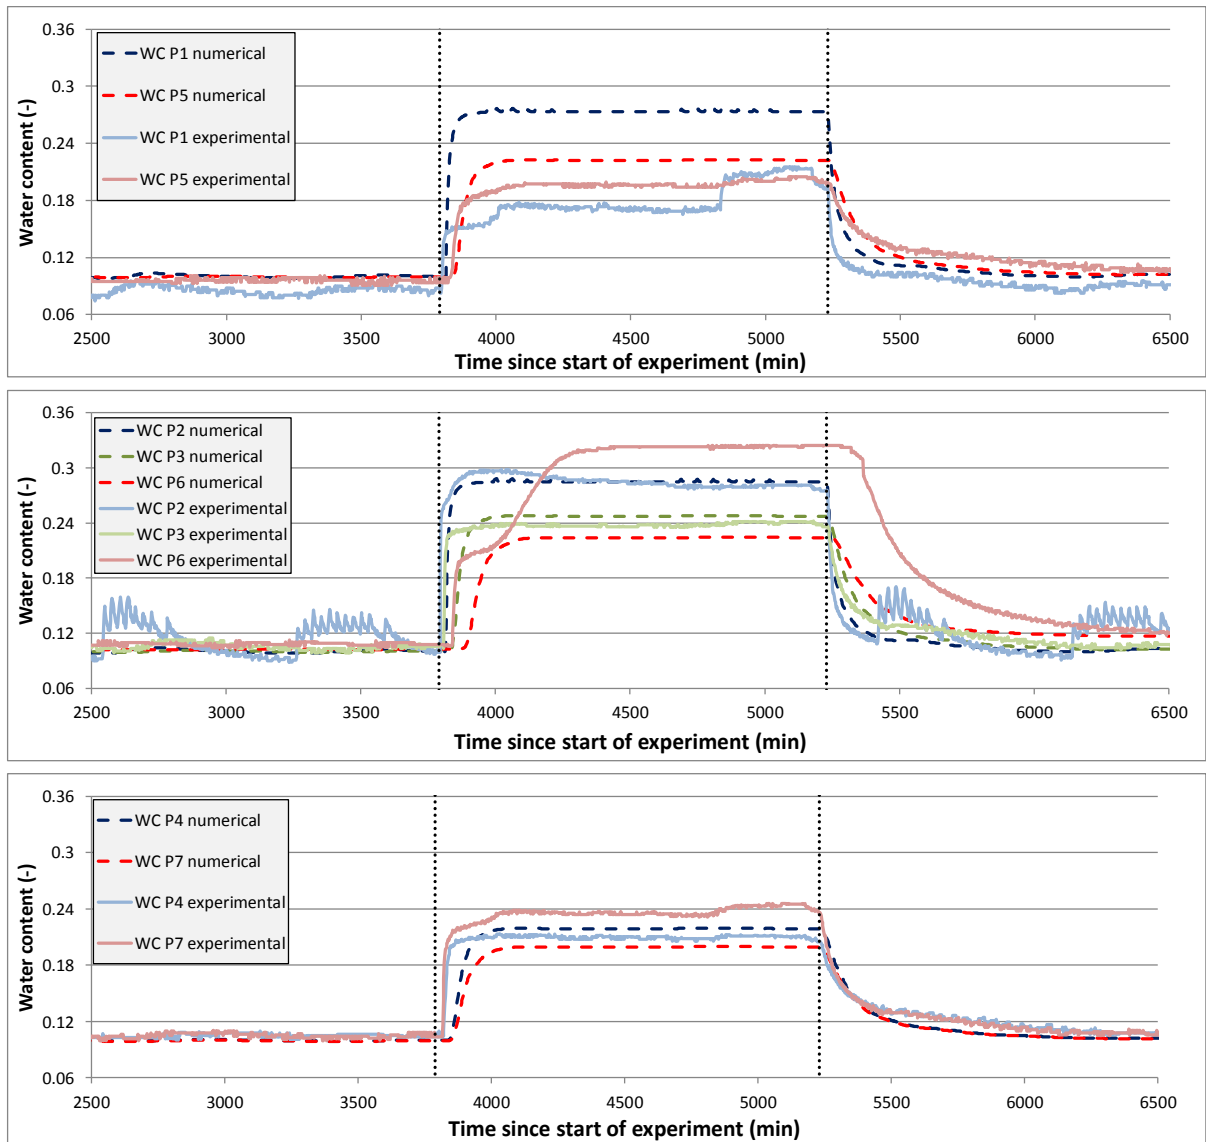

**Figure S2(3).** Results for simulation of water contents for scenario WW-RE-24 (jnt.) as compared to observed values in the laboratory tank experiment for the time 2500 to 6500 min after onset of the numerical experiment, black dotted line indicates duration of precipitation event

**Electronic Supplementary Materials S3: COD, NH<sub>4</sub>-N and NO<sub>3</sub>-N concentration profiles in the 3D-Tank before and after the precipitation events for separated, closely-spaced and joint infiltration**

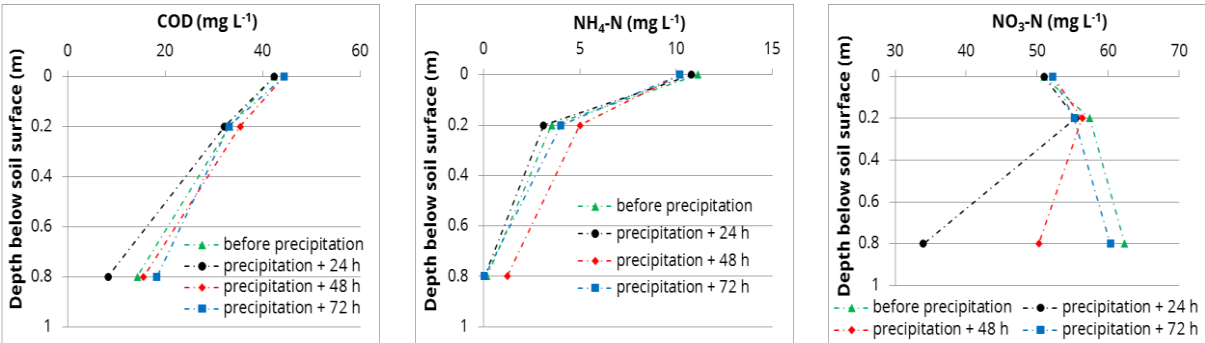

**Figure S3(1).** COD, NH<sub>4</sub>-N and NO<sub>3</sub>-N concentration profiles (sampling points: inflow, P1 and P5) before and 24h/48h/72h after the precipitation event WW-RE-Int for separated, closely-spaced infiltration

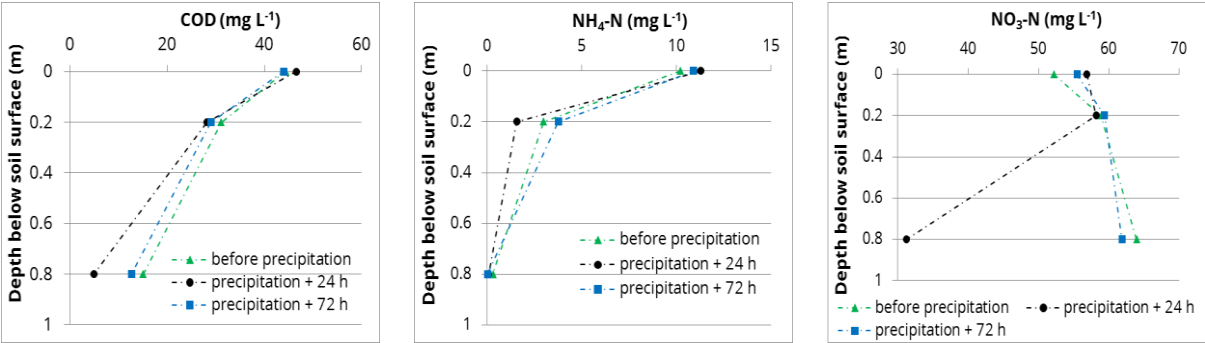

**Figure S3(2).** COD, NH<sub>4</sub>-N and NO<sub>3</sub>-N concentration profiles (sampling points: inflow, P1 and P5) before and 24h/72h after the precipitation event WW-RE-24 for separated, closely-spaced infiltration

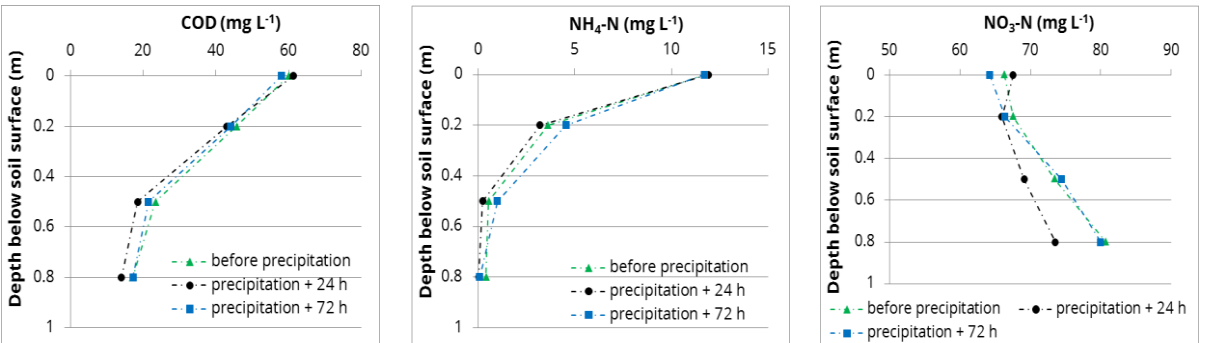

**Figure S3(3).** COD, NH<sub>4</sub>-N and NO<sub>3</sub>-N concentration profiles (sampling points: inflow, P2, P3 and P6) before and 24h/72h after the precipitation event WW-RE-Ref for joint infiltration

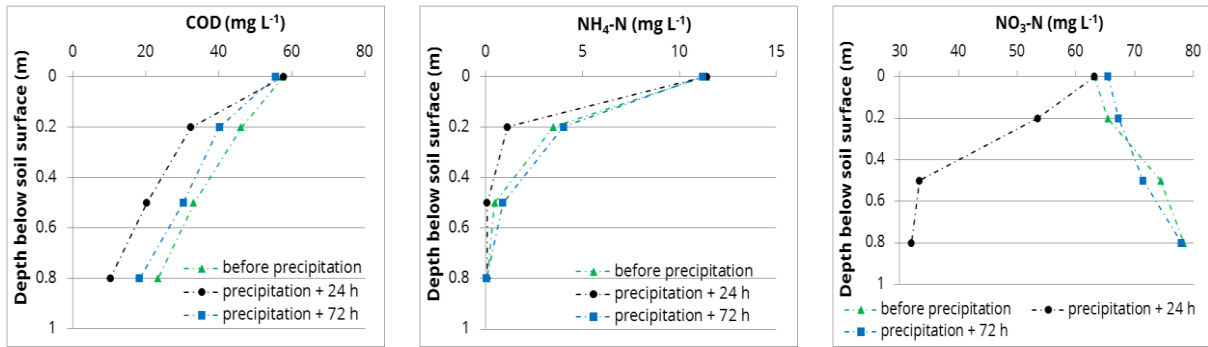

Figure S3(4). COD, NH<sub>4</sub>-N and NO<sub>3</sub>-N concentration profiles (sampling points: inflow, P2, P3 and P6) before and 24h/72h after the precipitation event WW-RE-Int for joint infiltration

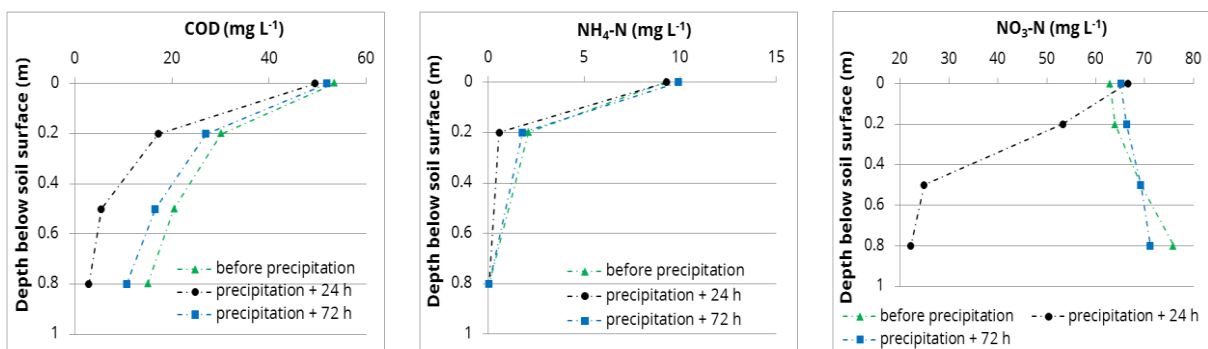

Figure S3(5). COD, NH<sub>4</sub>-N and NO<sub>3</sub>-N concentration profiles (sampling points: inflow, P2, P3 and P6) before and 24h/72h after the precipitation event WW-RE-24 for joint infiltration

**Electronic Supplementary Materials S4:** Oxygen saturation in water (temperature-corrected) before, during and after the precipitation events for separated, closely-spaced and joint infiltration

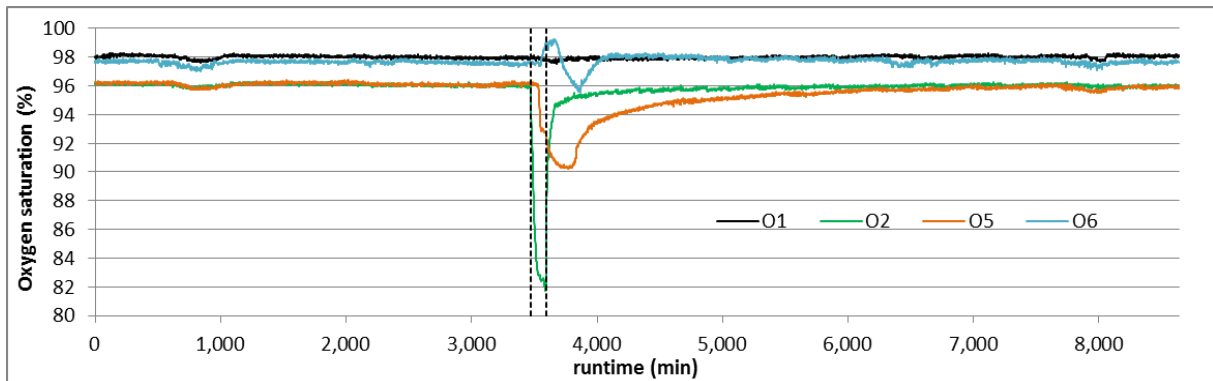

**Figure S4(1).** Oxygen saturation (observation points: P1, P2, P5 and P6) before, during and after the precipitation event WW-RE-Int for separated, closely-spaced infiltration

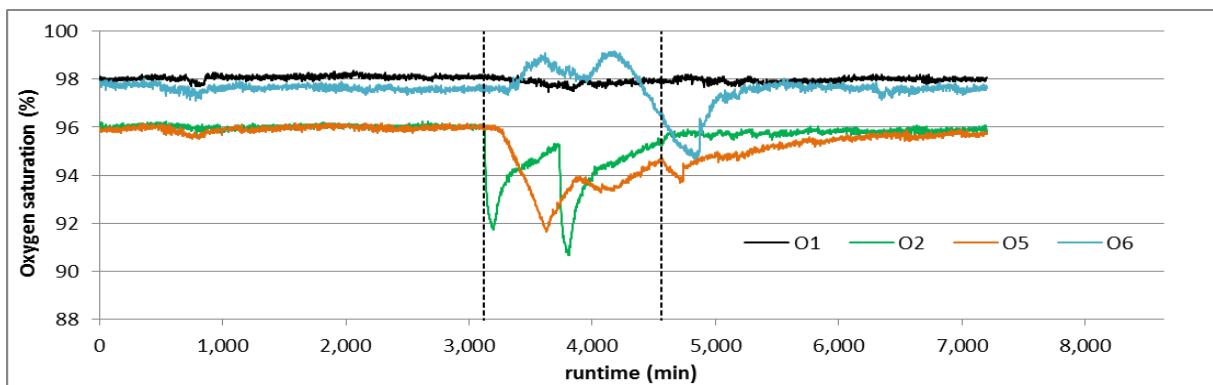

**Figure S4(2).** Oxygen saturation (observation points: P1, P2, P5 and P6) before, during and after the precipitation event WW-RE-24 for separated, closely-spaced infiltration

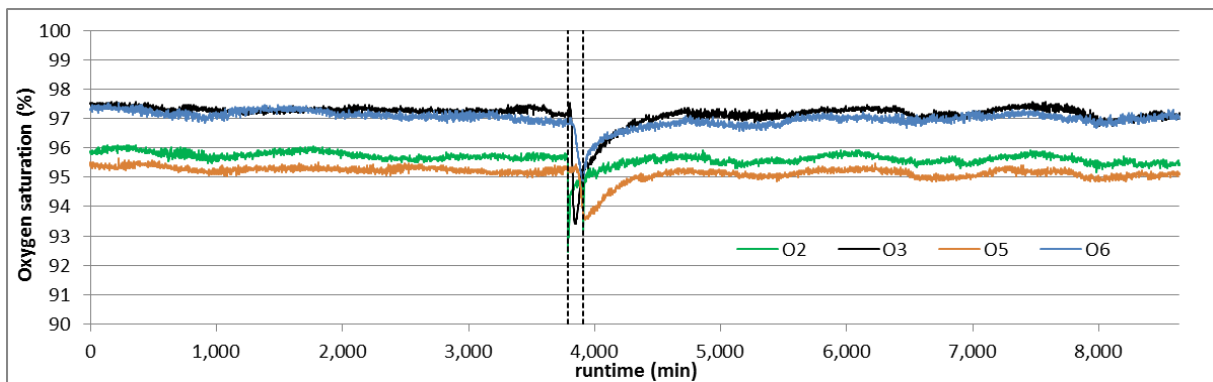

**Figure S4(3).** Oxygen saturation (observation points: P1, P2, P5 and P6) before, during and after the precipitation event WW-RE-Ref for joint infiltration

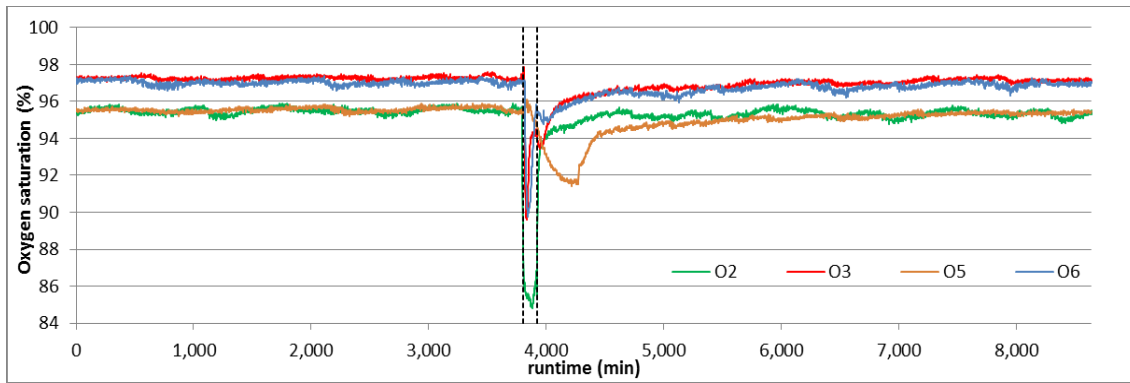

**Figure S4(4).** Oxygen saturation (observation points: P1, P2, P5 and P6) before, during and after the precipitation event WW-RE-Int for joint infiltration

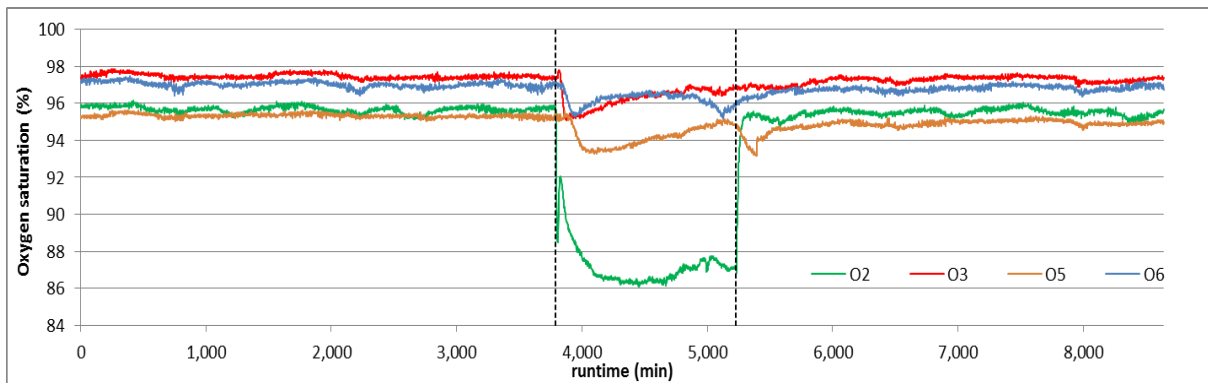

**Figure S4(5).** Oxygen saturation (observation points: P1, P2, P5 and P6) before, during and after the precipitation event WW-RE-24 for joint infiltration
